# Supplementary material for: Doctor Referral of Overweight People to Low Energy total diet replacement Treatment (DROPLET): pragmatic randomised controlled trial
Source: PubMed Central journal article supplement (PMC6156558; doi:10.1136/bmj.k3760), 2018-09-26
Supplement: astn044188.ww1.pdf [file astn044188.ww1.pdf]

## Supplementary Appendix

### Table of Contents:

|                                                                                           |   |
|-------------------------------------------------------------------------------------------|---|
| Full Inclusion and Exclusion criteria                                                     | 2 |
| Medication adjustment guidelines                                                          | 3 |
| Figure S1: Treatment effect by sub-group                                                  | 4 |
| Table S1: Typical Nutritional Composition of meal replacements used in TDR                | 5 |
| Table S2: Adjusted treatment effects under different missing data approaches              | 6 |
| Figure S2: Pattern mixture modelling                                                      | 7 |
| Table S3: Adverse events analysis                                                         | 8 |
| Table S6: 12 month outcomes for participants with a baseline diagnosis of type 2 diabetes | 9 |

## Full list of Inclusion and Exclusion criteria

### Inclusion:

Participants were included in the study if they met the following criteria:

- Participant is willing and able to give informed consent for participation in the study.
- Aged 18 years or above.
- Body Mass Index  $\geq 30$  kg/m<sup>2</sup>.
- Likely to benefit from weight loss in the Primary Care physician's opinion.

### Exclusion:

The following criteria were used to exclude individuals for whom weight loss might not be safe, those who may have difficulty adhering to TDR intervention, or those with medical conditions that were a contraindication to the TDR programme.

- Currently or recently (within 3 months of study entry) attended a weight management programme or currently participating in another weight loss study.
- Had bariatric surgery, or scheduled bariatric surgery.
- Pregnant, breastfeeding, or planning to become pregnant during the course of the study.
- Receiving insulin therapy
- Heart attack or stroke within the last 3 months
- Heart failure of grade II New York Heart Association and more severe
- Angina, arrhythmia, including atrial fibrillation or prolonged QT syndrome
- Taking MAOI medication
- Taking anticoagulant medication (e.g. warfarin)
- Taking varenicline (smoking cessation medication)
- Chronic renal failure of stage 4 or 5
- Active liver disease (except NAFLD) a past history of hepatoma or within 6 months of onset of acute hepatitis.
- People having active treatment for cancer other than skin cancer treated with curative intent by local treatment only or people taking hormonal or other long-term secondary prevention treatment after initial cancer treatment.
- Active treatment or investigation for possible or confirmed gastric or duodenal ulcer. Maintenance treatment with acid-suppression is not a contra-indication.
- Porphyria
- Scheduled for surgery within 12 months
- A member of household is already enrolled in the study
- Unwilling to provide blood samples
- Patients that the Primary Care physician judges not able to meet the demands of either treatment programme or measurement schedule. This may include severe medical problems not listed above or severe psychiatric problems including substance misuse that make following the treatment programme or adhering to the protocol unlikely.

## Medication adjustment guidelines

# Medication changes

**Guidance on making adjustments to your patients' medications**



This guidance aims to help you make these medication adjustments, but please use your clinical judgement or contact the lead physician for this study.

| TYPE 2 DIABETES          |                 |
|--------------------------|-----------------|
| Patient currently takes: | Recommendation  |
| Metformin                | HALF daily dose |
| Sulphonylurea            | STOP            |
| Glitazone                | STOP            |
| Glinide                  | STOP            |
| DPP IV inhibitor         | STOP            |
| Acarbose                 | STOP            |

At the end of the weight loss phase, re-assess patients requirements for oral diabetic therapies using HbA1c measurements or a finger prick blood glucose measurement.

| HYPERTENSION             |                        |                              |
|--------------------------|------------------------|------------------------------|
| Patient currently takes: | Current dose           | Recommendation               |
| Loop Diuretic:           |                        |                              |
| <i>Furosemide</i>        | ≤ 40 mg daily          | STOP                         |
|                          | 80 – 120 mg daily      | REDUCE <u>by</u> 40 mg daily |
|                          | ≥ 120 mg daily         | REDUCE <u>by</u> 40 mg daily |
| <i>Bumetamide</i>        |                        |                              |
|                          | ≤ 1 mg daily           | STOP                         |
|                          | 2-3 mg daily           | REDUCE <u>to</u> 1mg daily   |
|                          | ≥ 3 mg daily           | REDUCE <u>by</u> 1mg daily   |
| Thiazide Diuretic        |                        | STOP                         |
| β Blocker                |                        |                              |
|                          | Used for hypertension  | STOP                         |
|                          | Other uses             | CONTINUE                     |
| α Blocker                |                        | HALF daily dose              |
| Ca channel blocker       |                        | HALF daily dose              |
| ACE inhibitors or ARBs   |                        |                              |
|                          | Used for hypertension  | STOP                         |
|                          | Used for heart failure | HALF daily dose              |

| LIPID DRUGS              |                |
|--------------------------|----------------|
| Patient currently takes: | Recommendation |
| Fibrates                 | STOP           |
| Statins                  | CONTINUE       |
| Ezetimibe                | CONTINUE       |

**Figure S1:** Treatment effect by sub-groups

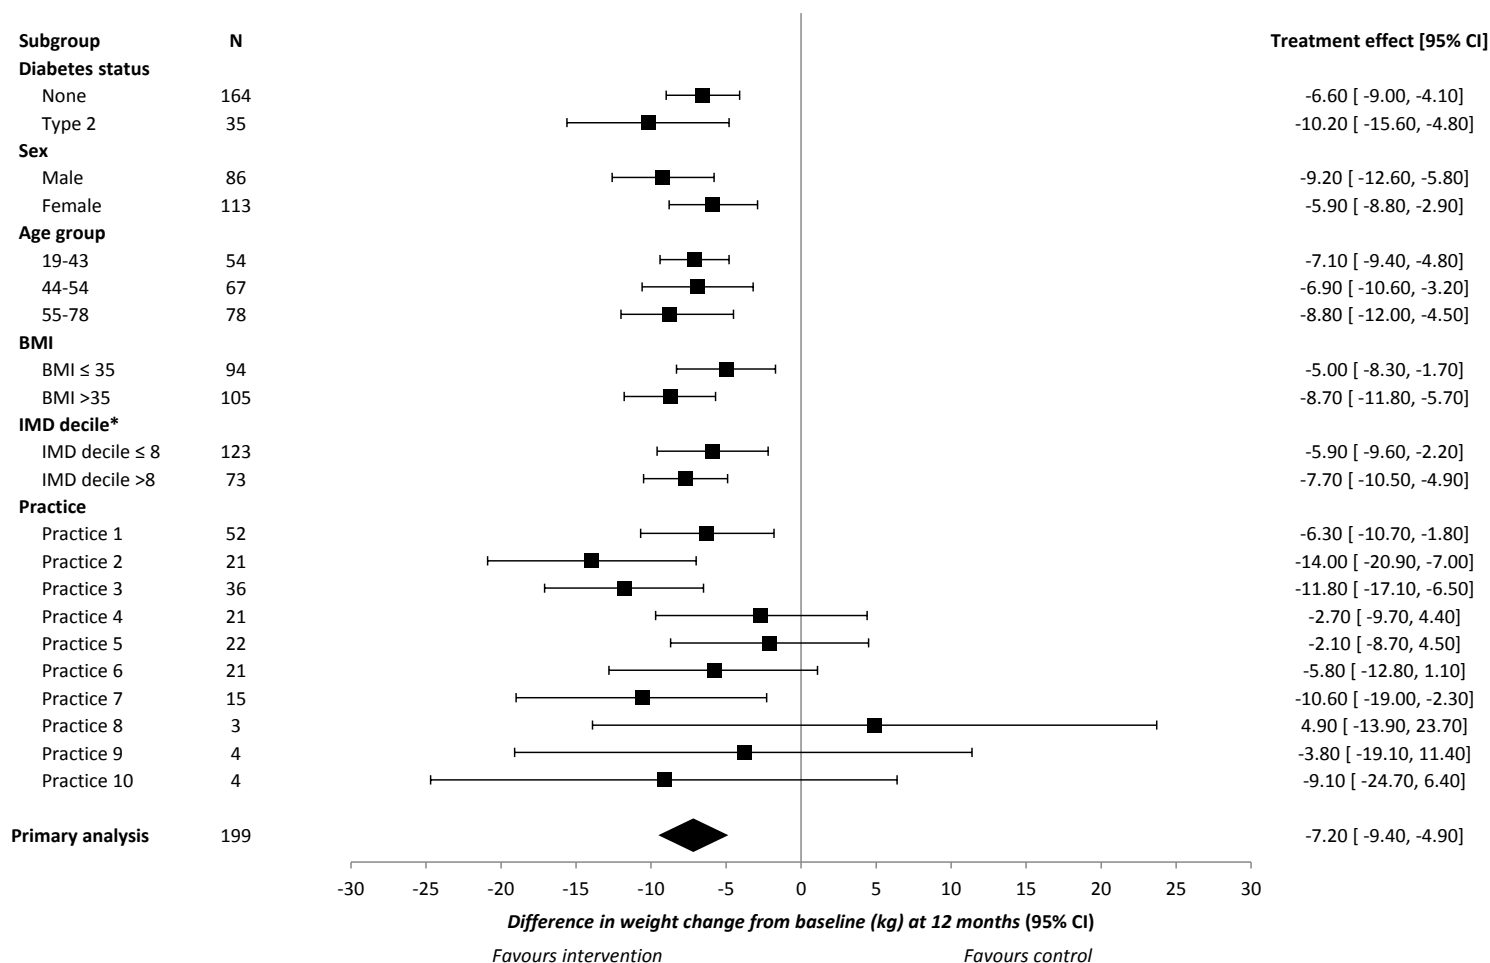

\*IMD decile is an indicator of deprivation, with decile 1 being most deprived, and decile 10 the least deprived. IMD groups were compared using median split. IMD was not a pre-specified sub-group analysis, and was added after the statistical analysis plan was written, but before the primary analysis was conducted.

**Table S2:** Typical Nutritional Composition of meal replacement products used in the total diet replacement programme

|                        | <b>Per 100g</b> | <b>Per serving</b> |
|------------------------|-----------------|--------------------|
| Energy                 |                 |                    |
| kJ                     | 1565            | 845                |
| kcal                   | 370             | 200                |
| Fat (g)                | 4.8             | 2.6                |
| of which saturates (g) | 0.9             | 0.5                |
| Carbohydrate (g)       | 50.1            | 27.0               |
| Of which sugars (g)    | 35.1            | 18.9               |
| Fibre                  | 5.2             | 2.8                |
| Protein                | 29.2            | 15.8               |
| Salt                   | 1.2             | 0.6                |

**Table S3:** Adjusted treatment effects under different missing data approaches

|                                         | BOCF                    |                | LOCF                   |                | Multiple imputation   |                 | Completers only      |                |
|-----------------------------------------|-------------------------|----------------|------------------------|----------------|-----------------------|-----------------|----------------------|----------------|
|                                         | Usual Care<br>(N = 138) | TDR<br>(N=134) | Usual care<br>(N= 138) | TDR<br>(N=134) | Usual Care<br>(N=138) | TDR<br>(N= 134) | Usual Care<br>(N=95) | TDR<br>(N=104) |
| Unadjusted weight change from baseline* | -2.1 ± 6.0              | -8.3 ± 9.6     | -2.7 ± 6.3             | -10.2 ± 9.2    | -3.5 ± 8.2            | -10.2 ± 9.7     | -3.1 ± 7.0           | -10.7 ± 9.6    |
| Difference between groups †             | -6.1 (-8.0, -4.3)       |                | -7.5 (-9.4, -5.6)      |                | -6.4 (-8.5, -4.4)     |                 | -7.5 (-9.8, -5.1)    |                |
| p-value                                 | <0.0001                 |                | <0.0001                |                | <0.0001               |                 | <0.0001              |                |

\*Mean weight (kg) ± SD

† Adjusted mean difference (kg) (95% CI) using linear mixed effects model with fixed effects for randomisation group, baseline weight, visit and randomised group x visit interaction. Random effects accounting for practice and participant and within subject variance covariance matrix specified as unstructured. Age and sex were included as covariates as baseline values were predictive of missingness.

Figure S2: Pattern mixture modelling for weight at 12 months

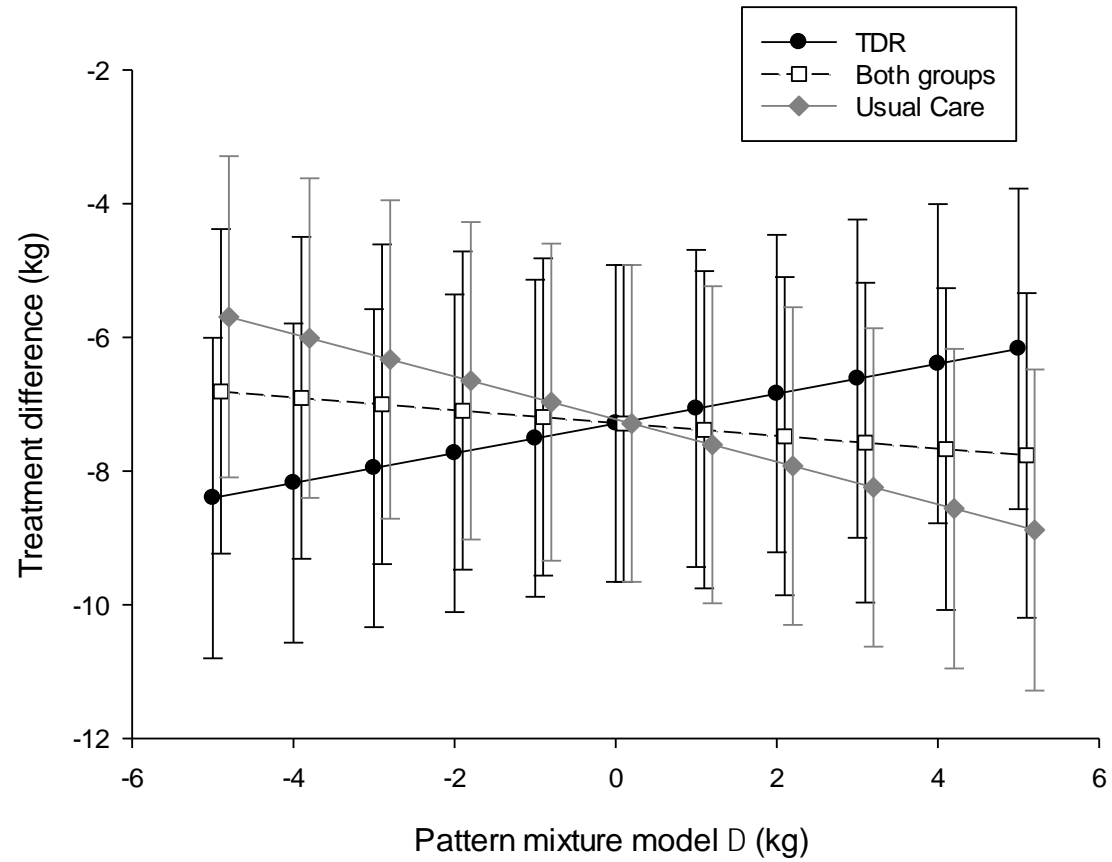

**Table S5:** Adverse Events analysis\*

|                                                      | Usual Care | Total Diet Replacement | p value |
|------------------------------------------------------|------------|------------------------|---------|
| Participants reporting at least one AE n (%)         | 41 (29.7)  | 69 (51.5)              | 0.0003  |
| Participants reporting a moderate or severe AE n (%) | 17 (12.3)  | 15 (11.2)              | 0.85    |

\*A logistic model would not converge, therefore a Fisher's exact test was used to test the associations between groups.



**Table S6:** 12 month outcomes for participants with a baseline diagnosis of type 2 diabetes

|                                              | Change from baseline (mean $\pm$ SD) |    |                        |    | Treatment difference         |         |
|----------------------------------------------|--------------------------------------|----|------------------------|----|------------------------------|---------|
|                                              | Usual Care                           | n  | Total Diet Replacement | n  | Adjusted difference (95% CI) | p value |
| <b>12 months</b>                             |                                      |    |                        |    |                              |         |
| Weight (kg) <sup>1</sup>                     | -3.2 $\pm$ 5.4                       | 17 | -13.0 $\pm$ 9.1        | 18 | -9.9 (-14.8, -5.0)           | <0.0001 |
| Waist circumference (cm) <sup>3</sup>        | -5.7 $\pm$ 6.0                       | 17 | -11.8 $\pm$ 10.9       | 17 | -5.9 (-11.8; 0)              | 0.0504  |
| Fat mass (kg) <sup>2</sup>                   | -4.3 $\pm$ 5.6                       | 17 | -13.2 $\pm$ 9.2        | 17 | -6.3 (-12.4; -0.2)           | 0.0426  |
| Systolic Blood Pressure (mmHg) <sup>2</sup>  | 5.9 $\pm$ 17.4                       | 16 | 2.1 $\pm$ 19.1         | 17 | -1.4 (-12.7; 9.9)            | 0.8065  |
| Diastolic Blood Pressure (mmHg) <sup>2</sup> | 1.0 $\pm$ 9.8                        | 16 | -2.5 $\pm$ 11.9        | 17 | -2.9 (-9.5; -3.6)            | 0.3769  |
| HbA1c (mmol/mol) <sup>2</sup>                | -8.3 $\pm$ 15.4                      | 17 | -8.5 $\pm$ 17.8        | 17 | 0.09 (-13.5; 13.7)           | 0.9885  |
| Fasting glucose (mmol/L) <sup>3</sup>        | -0.3 $\pm$ 2.6                       | 12 | -1.7 $\pm$ 3.9         | 15 | -1.0 (-2.8; -0.8)            | 0.2449  |
| Fasting insulin (pmol/L) <sup>3</sup>        | -2.2 $\pm$ 32.0                      | 12 | -26.9 $\pm$ 37.3       | 16 | -22.7 (-46.5; 1.2)           | 0.0608  |
| HOMA- IR <sup>3</sup>                        | -0.1 $\pm$ 0.6                       | 12 | -1.1 $\pm$ 2.3         | 15 | -0.62 (-1.23; -0.01)         | 0.0480  |
| HOMA $\beta$ (%) <sup>3</sup>                | -26.5 $\pm$ 100.7                    | 12 | 1.2 $\pm$ 22.8         | 15 | 4.3 (-19.9; 28.5)            | 0.7089  |
| HOMA S (%) <sup>3</sup>                      | 5.0 $\pm$ 47.3                       | 12 | 24.0 $\pm$ 29.7        | 15 | 19.4 (-13.7; 52.6)           | 0.3687  |
| Total Cholesterol (mmol/L)                   | 0.5 $\pm$ 0.8                        | 12 | 0.1 $\pm$ 1.2          | 15 | -0.37 (-1.2, 0.5)            | 0.1050  |

|                                       |           |    |            |    |                   |        |
|---------------------------------------|-----------|----|------------|----|-------------------|--------|
| HDL cholesterol (mmol/L) <sup>3</sup> | 0.1 ± 0.2 | 12 | 0.1 ± 0.5  | 15 | -0.02 (-0.2; 0.2) | 0.8047 |
| LDL Cholesterol (mmol/L) <sup>2</sup> | 0.2 ± 0.8 | 11 | 0.3 ± 1.0  | 14 | -3.0 (-8.5; 2.5)  | 0.2327 |
| Triglycerides (mmol/L) <sup>3</sup>   | 0.2 ± 0.9 | 12 | -0.5 ± 1.7 | 15 | -0.67 (-1.9; 0.6) | 0.2655 |

---

<sup>1</sup>Primary outcome

<sup>2</sup>Secondary outcome

<sup>3</sup>Exploratory outcome
